# Supplementary material for: Prevalence of dementia in ischaemic or mixed stroke populations: systematic review and meta-analysis
Source: PubMed Central journal article supplement — J Neurol Neurosurg Psychiatry. 2021 Nov 15;93(2):180–7. doi: 10.1136/jnnp-2020-325796 (PMC8784999; doi:10.1136/jnnp-2020-325796), 2021-11-15
Supplement: jnnp-2020-325796supp001.pdf [file jnnp-2020-325796supp001.pdf]

- S1. Qu Y, Zhuo L, Li N, et al. Prevalence of post-stroke cognitive impairment in china: a community-based, cross-sectional study. *PLoS One*. 2015;10:e0122864.
- S2. Zhang C, She Y, Lan T, et al. Study on epidemiology of cognitive dysfunction after stroke in the population over the age of 45 in Inner Mongolia. *International Journal of Neuroscience*. 2018;128:654-62.
- S3. Das S, Paul N, Hazra A, et al. Cognitive dysfunction in stroke survivors: a community-based prospective study from Kolkata, India. *Journal of stroke and cerebrovascular diseases : the official journal of National Stroke Association*. 2013;22:1233-42.
- S4. Surawan J, Sirithanawutichai T, Areemit S, et al. Prevalence and factors associated with memory disturbance and dementia after acute ischemic stroke. *Neurol Int*. 2018;10:7761.
- S5. Kumutpongpanich T, Senanarong V. Associations Between Brain Imaging Characteristics and Cognition in Post-Stroke Patients. *J Med Assoc Thai*. 2017:100.
- S6. Pendlebury ST, Rothwell PM, Oxford Vascular S. Incidence and prevalence of dementia associated with transient ischaemic attack and stroke: analysis of the population-based Oxford Vascular Study. *The Lancet Neurology*. 2019;18:248-58.
- S7. Yu KH, Cho SJ, Oh MS, et al. Cognitive impairment evaluated with Vascular Cognitive Impairment Harmonization Standards in a multicenter prospective stroke cohort in Korea. *Stroke*. 2013;44:786-8.
- S8. Akinyemi RO, Allan L, Owolabi MO, et al. Profile and determinants of vascular cognitive impairment in African stroke survivors: The CogFAST Nigeria Study. *Journal of the Neurological Sciences*. 2014;346:241-9.
- S9. Arauz A, Rodríguez-Agudelo Y, Sosa AL, et al. Vascular Cognitive Disorders and Depression After First-Ever Stroke: The Fogarty-Mexico Stroke Cohort. *Cerebrovascular Diseases*. 2014;38:284-9.
- S10. Caratozzolo S, Mombelli G, Riva M, et al. Dementia after Three Months and One Year from Stroke: New Onset or Previous Cognitive Impairment? *Journal of Stroke and Cerebrovascular Diseases*. 2016;25:2735-45.
- S11. Clark DG, Boan AD, Sims-Robinson C, et al. Differential Impact of Index Stroke on Dementia Risk in African-Americans Compared to Whites. *Journal of Stroke and Cerebrovascular Diseases*. 2018;27:2725-30.
- S12. Corraini P, Henderson VW, Ording AG, et al. Long-Term Risk of Dementia Among Survivors of Ischemic or Hemorrhagic Stroke. *Stroke*. 2017;48:180-6.
- S13. Delgado C, Donoso A, Orellana P, et al. Frequency and Determinants of Poststroke Cognitive Impairment at Three and Twelve Months in Chile. *Dementia and Geriatric Cognitive Disorders*. 2010;29:397-405.
- S14. Ihle-Hansen H, Thommessen B, Wyller TB, et al. Incidence and subtypes of MCI and dementia 1 year after first-ever stroke in patients without pre-existing cognitive impairment. *Dement Geriatr Cogn Disord*. 2011;32:401-7.
- S15. Kim, J. H. Lee, Yunhwan. Dementia and Death After Stroke in Older Adults During A 10-Year Follow-Up : Results From A Competing Risk Model. *J Nutr Health Aging*. 2018;22:2.
- S16. Khedr EM, Hamed SA, El-Shereef HK, et al. Cognitive impairment after cerebrovascular stroke: Relationship to vascular risk factors. *Neuropsychiatric disease and treatment*. 2009;5:103-16.
- S17. Mehrabian S, Raycheva M, Petrova N, et al. Neuropsychological and neuroimaging markers in prediction of cognitive impairment after ischemic stroke: a prospective follow-up study. *Neuropsychiatric disease and treatment*. 2015;11:2711-9.
- S18. Ojagbemi A, Owolabi M, Bello T, et al. Stroke severity predicts poststroke delirium and its association with dementia: Longitudinal observation from a low income setting. *Journal of the Neurological Sciences*. 2017;375:376-81.
- S19. Portegies Marileen LP, Wolters Frank J, Hofman A, et al. Prestroke Vascular Pathology and the Risk of Recurrent Stroke and Poststroke Dementia. *Stroke*. 2016;47:2119-22.
- S20. Renjen PN, Gauba C, Chaudhari D. Cognitive Impairment After Stroke. *Cureus*. 2015;7:e335-e.

- S21. Sarfo FS, Akassi J, Adamu S, et al. Burden and Predictors of Poststroke Cognitive Impairment in a Sample of Ghanaian Stroke Survivors. *Journal of stroke and cerebrovascular diseases : the official journal of National Stroke Association*. 2017;26:2553-62.
- S22. Selim HA. Prestroke cognitive decline and early epileptic seizures after stroke as predictors of new onset dementia. *Egyptian Journal of Neurology, Psychiatry and Neurosurgery*. 2009;46:579-87.
- S23. Tang EYH, Robinson L, Stephan BCM. Risk Prediction Models for Post-Stroke Dementia. *Geriatrics (Basel)*. 2017;2:19.
- S24. Tu Q, Ding B, Yang X, et al. The current situation on vascular cognitive impairment after ischemic stroke in Changsha. *Arch Gerontol Geriatr*. 2014;58:236-47.
- S25. Yang J, Wong A, Wang Z, et al. Risk factors for incident dementia after stroke and transient ischemic attack. *Alzheimer's & Dementia*. 2015;11:16-23.
- S26. Ben Assayag E, Eldor R, Korczyn Amos D, et al. Type 2 Diabetes Mellitus and Impaired Renal Function Are Associated With Brain Alterations and Poststroke Cognitive Decline. *Stroke*. 2017;48:2368-74.
- S27. Altieri M, Di Piero V, Pasquini M, et al. Delayed poststroke dementia: a 4-year follow-up study. *Neurology*. 2004;62:2193-7.
- S28. Barba R, Martinez-Espinosa S, Rodriguez-Garcia E, et al. Poststroke dementia : clinical features and risk factors. *Stroke*. 2000;31:1494-501.
- S29. Corsari B, Manara O, Agostinis C, et al. Dementia after first stroke. *Stroke*. 1996;27:1205-10.
- S30. De Koning I, van Kooten F, Dippel DW, et al. The CAMCOG: a useful screening instrument for dementia in stroke patients. *Stroke*. 1998;29:2080-6.
- S31. De Koning I, van Kooten F, Koudstaal PJ, et al. Diagnostic value of the Rotterdam-CAMCOG in post-stroke dementia. *J Neurol Neurosurg Psychiatry*. 2005;76:263-5.
- S32. Desmond DW, Moroney JT, Paik MC, et al. Frequency and clinical determinants of dementia after ischemic stroke. *Neurology*. 2000;54:1124-31.
- S33. Gur AY, Neufeld MY, Treves TA, et al. EEG as predictor of dementia following first ischemic stroke. *Acta Neurologica Scandinavica*. 1994;90:263-5.
- S34. Henon H, Durieu I, Guerouaou D, et al. Poststroke dementia: incidence and relationship to prestroke cognitive decline. *Neurology*. 2001;57:1216-22.
- S35. Inzitari D, Di Carlo A, Pracucci G, et al. Incidence and determinants of poststroke dementia as defined by an informant interview method in a hospital-based stroke registry. *Stroke*. 1998;29:2087-93.
- S36. Kase CS, Wolf PA, Kelly-Hayes M, et al. Intellectual decline after stroke: the Framingham Study. *Stroke*. 1998;29:805-12.
- S37. Klimkowicz A, Dziedzic T, Slowik A, et al. Incidence of pre- and poststroke dementia: cracow stroke registry. *Dement Geriatr Cogn Disord*. 2002;14:137-40.
- S38. Pohjasvaara T, Erkinjuntti T, Vataja R, et al. Dementia three months after stroke. Baseline frequency and effect of different definitions of dementia in the Helsinki Stroke Aging Memory Study (SAM) cohort. *Stroke*. 1997;28:785-92.
- S39. Srikanth VK, Anderson JF, Donnan GA, et al. Progressive dementia after first-ever stroke: a community-based follow-up study. *Neurology*. 2004;63:785-92.
- S40. Tang WK, Chan SS, Chiu HF, et al. Frequency and determinants of poststroke dementia in Chinese. *Stroke*. 2004;35:930-5.
- S41. Zhou DH, Wang JY, Li J, Deng J, Gao C, Chen M. Study on frequency and predictors of dementia after ischemic stroke: the Chongqing stroke study. *Journal of neurology*. 2004;251(4):421-7.
- S42. Kokmen E, Whisnant JP, O'Fallon WM, et al. Dementia after ischemic stroke: a population-based study in Rochester, Minnesota (1960-1984). *Neurology*. 1996;46:154-9.

- S43. Andersen G, Vestergaard K, Østergaard Riis J, Ingeman-Nielsen M. Intellectual Impairment in the First Year following Stroke, Compared to an Age-Matched Population Sample. *Cerebrovascular Diseases*. 1996;6(6):363-9.
- S44. Gorelick PB, Brody J, Cohen D, et al. Risk factors for dementia associated with multiple cerebral infarcts. A case-control analysis in predominantly African-American hospital-based patients. *Arch Neurol*. 1993;50:714-20.
- S45. Appelros P. Characteristics of Mini-Mental State Examination 1 year after stroke. *Acta Neurol Scand*. 2005;112:88-92.
