# Supplementary material for: Prevalence of dementia in ischaemic or mixed stroke populations: systematic review and meta-analysis
Source: PubMed Central journal article supplement — J Neurol Neurosurg Psychiatry. 2021 Nov 15;93(2):180–7. doi: 10.1136/jnnp-2020-325796 (PMC8784999; doi:10.1136/jnnp-2020-325796), 2021-11-15
Supplement: jnnp-2020-325796supp003.pdf [file jnnp-2020-325796supp003.pdf]

|                                                                                                         | NEWCASTLE - OTTAWA QUALITY ASSESSMENT SCALE                                                                                                                                                                                                                                                                       | NEWCASTLE - OTTAWA QUALITY ASSESSMENT SCALE (Modified version)                            |
|---------------------------------------------------------------------------------------------------------|-------------------------------------------------------------------------------------------------------------------------------------------------------------------------------------------------------------------------------------------------------------------------------------------------------------------|-------------------------------------------------------------------------------------------|
| Selection                                                                                               | 1) <u>Representativeness of the exposed cohort</u><br>a) truly representative of the average _____ (describe) in the community *<br>b) somewhat representative of the average _____ in the community *<br>c) selected group of users e.g. nurses, volunteers<br>d) no description of the derivation of the cohort | Truly / Somewhat describes a stroke population with dementia                              |
|                                                                                                         |                                                                                                                                                                                                                                                                                                                   | Selected group described (may not represent exclusively stroke population with dementia)  |
|                                                                                                         |                                                                                                                                                                                                                                                                                                                   | No description                                                                            |
|                                                                                                         | 3) <u>Ascertainment of exposure</u><br>a) secure record (e.g. surgical records) *<br>b) structured interview *<br>c) written self-report<br>d) no description                                                                                                                                                     | Clinical diagnosis of stroke and dementia +/- inv. / Interview with subsequent validation |
|                                                                                                         |                                                                                                                                                                                                                                                                                                                   | Case Report / Structured interview (with no validation by clinician)                      |
|                                                                                                         |                                                                                                                                                                                                                                                                                                                   | Written / Self-reported / No description                                                  |
| 4) <u>Demonstration that outcome of interest was not present at start of study</u><br>a) yes *<br>b) no | Post-Stroke Dementia clearly defined                                                                                                                                                                                                                                                                              |                                                                                           |
|                                                                                                         | Post stroke dementia mixed with pre-stroke dementia (no description to separate them)                                                                                                                                                                                                                             |                                                                                           |
|                                                                                                         | No proper description of cohort                                                                                                                                                                                                                                                                                   |                                                                                           |
| Comparability                                                                                           | 1) <u>Comparability of cohorts on the basis of the design or analysis</u><br>a) study controls for _____ (select the most important factor) *<br>b) study controls for any additional factor* (This criteria could be modified to indicate specific control for a second                                          | Description of Age + Sex + Vascular Risk Factor + Additional Factors                      |
|                                                                                                         |                                                                                                                                                                                                                                                                                                                   | Description of Age + Sex + (at least 1) Vascular Risk Factor                              |

|                |                                                                                                                                                                                                                                                                                                                                                                                  |                                                                     |
|----------------|----------------------------------------------------------------------------------------------------------------------------------------------------------------------------------------------------------------------------------------------------------------------------------------------------------------------------------------------------------------------------------|---------------------------------------------------------------------|
|                | important factor.)                                                                                                                                                                                                                                                                                                                                                               | Age / Sex / Age+Sex / No description                                |
| <b>Outcome</b> | 1) <u>Assessment of outcome</u><br>a) independent blind assessment *<br>b) record linkage *<br>c) self-report<br>d) no description                                                                                                                                                                                                                                               | Clinical Diagnosis                                                  |
|                |                                                                                                                                                                                                                                                                                                                                                                                  | Neuro-psychological battery (test only with no clinical assessment) |
|                |                                                                                                                                                                                                                                                                                                                                                                                  | Self reported / No description                                      |
|                | 2) <u>Was follow-up long enough for outcomes to occur</u><br>a) yes (select an adequate follow up period for outcome of interest) *<br>b) no                                                                                                                                                                                                                                     | 1 year or more                                                      |
|                |                                                                                                                                                                                                                                                                                                                                                                                  | 3 months - 1 year                                                   |
|                |                                                                                                                                                                                                                                                                                                                                                                                  | Less than 3 months                                                  |
|                | 3) <u>Adequacy of follow up of cohorts</u><br>a) complete follow up - all subjects accounted for *<br>b) subjects lost to follow up unlikely to introduce bias - small number lost - > ____ % (select an adequate %) follow up, or description provided of those lost) *<br>c) follow up rate < ____% (select an adequate %) and no description of those lost<br>d) no statement | Complete / >90% accounted)                                          |
|                |                                                                                                                                                                                                                                                                                                                                                                                  | Numbers lost > 90% with no description                              |
|                |                                                                                                                                                                                                                                                                                                                                                                                  | No description of loss or completeness                              |
|                | <b>Note:</b> A study can be awarded a maximum of one star for each numbered item within the Selection and Outcome categories. A maximum of two stars can be given for Comparability                                                                                                                                                                                              |                                                                     |
