# Supplementary material for: Prevalence of dementia in ischaemic or mixed stroke populations: systematic review and meta-analysis
Source: PubMed Central journal article supplement — J Neurol Neurosurg Psychiatry. 2021 Nov 15;93(2):180–7. doi: 10.1136/jnnp-2020-325796 (PMC8784999; doi:10.1136/jnnp-2020-325796), 2021-11-15
Supplement: jnnp-2020-325796supp004.pdf [file jnnp-2020-325796supp004.pdf]

**Table S1** Table of study characteristics

| Study, Year<br>Country                                                | Date of data<br>Collection | No. of<br>population<br><br>Study Type | FES | Exclusion Criteria                                                                                                                                     | Mean Age<br>(SD) | Female<br>(%) | Ischaemic<br>Stroke (%) | Pre-stroke<br>dementia<br>excluded | Pre-stroke<br>dementia<br>quantified | Follow-up<br>Duration   | PSD Assessment<br>Method                                                                 |
|-----------------------------------------------------------------------|----------------------------|----------------------------------------|-----|--------------------------------------------------------------------------------------------------------------------------------------------------------|------------------|---------------|-------------------------|------------------------------------|--------------------------------------|-------------------------|------------------------------------------------------------------------------------------|
| <b>Alteri et al,<br/>2004, Italy<br/>(S27)</b>                        | 1995-97                    | N=191<br><br>L                         | Y   | Severe aphasia or<br>neglect, <5 years'<br>education,<br><br>SAH, age <40 years,<br>concomitant<br>neurological<br><br>disorder, severe<br>comorbidity | 71               | 30            | 89                      | Y                                  | N                                    | Annually for<br>4 years | ICD-10                                                                                   |
| <b>Caratozzolo<br/>et al,<br/>2016, Italy<br/>(S10)</b>               | 2011                       | N=105<br><br>P                         | Y * | TIA                                                                                                                                                    | 72.4<br>(10.7)   | 37.1          | 85                      | Y                                  | Y<br><br>IQ-CODE                     | 12 months               | Itel-MMSE ( < 24 )<br><br>DSM-IV                                                         |
| <b>Delgado et al,<br/>2010, Chile<br/>(S13)</b>                       | 2005-2006                  | N=74<br><br>P                          | Y * | Poor<br>consciousness,<br>TIA,SAH, CNS<br>Disorders, Severely<br>impaired stroke<br>(mRS >3)                                                           | 72.2 (7.7)       | 42.0          | 89.0                    | Y                                  | Y<br><br>SS-IQCODE                   | 12 months               | Neuropsychologic<br>al evaluation<br>including MMSE &<br>Mattis Dementia<br>Rating Scale |
| <b>de Koning et<br/>al, 1998, 2000<br/>Netherlands<br/>(S30, S31)</b> | 1993-96                    | N=300<br><br>X                         | N   | Aphasia, sensory<br>impairment, not<br>fluent in Dutch,                                                                                                | 70               | 40.0          | 71                      | N                                  | NA                                   | 3-9months               | DSM IIIR                                                                                 |

| Study, Year<br>Country                                     | Date of data<br>Collection | No. of<br>population<br>Study Type | FES | Exclusion Criteria                                                                                                                | Mean Age<br>(SD) | Female<br>(%) | Ischaemic<br>Stroke (%) | Pre-stroke<br>dementia<br>excluded | Pre-stroke<br>dementia<br>quantified | Follow-up<br>Duration               | PSD Assessment<br>Method |
|------------------------------------------------------------|----------------------------|------------------------------------|-----|-----------------------------------------------------------------------------------------------------------------------------------|------------------|---------------|-------------------------|------------------------------------|--------------------------------------|-------------------------------------|--------------------------|
|                                                            |                            |                                    |     | reduced<br>consciousness                                                                                                          |                  |               |                         |                                    |                                      |                                     |                          |
| <b>de Koning et al,<br/>2005<br/>Netherlands<br/>(S31)</b> | 2000-01                    | N=121<br>X                         | N   | Aphasia, sensory<br>impairment, not<br>fluent in Dutch,<br><br>reduced<br>consciousness                                           | 70               | 38            | 63                      | N                                  | Y (FU only)<br><br>Interview         | 3-9months                           | DSM IIIR                 |
| <b>Gur et al,<br/>1994, Israel<br/>(S33)</b>               | 1988-90                    | N=199<br>L                         | Y   | Aphasia                                                                                                                           | 73               | 53            | 100                     | Y                                  | N                                    | 6 monthly<br>to 5 years             | DSM IIIR                 |
| <b>Henon et al,<br/>2002 France<br/>(S34)</b>              | 1995-1996                  | N=142<br>L                         |     | Non-white, no<br>informant, age <40<br>years, not<br><br>fluent in French,<br>not from Lille,<br>history of severe<br>head trauma | 72               | 46            | Not<br>reported         | N                                  | Y<br><br>IQCODE                      | 6 months,<br>annually to<br>3 years | ICD-10                   |
| <b>Inzitari et al<br/>1998, Italy<br/>(S35)</b>            | 1993-94                    | N=339<br>X                         | N   | None given                                                                                                                        | 71               | 48            | 83.2                    | Y                                  | Y (FU only)<br><br>Interview         | 1 year                              | ICD-10                   |

| Study, Year<br>Country                                | Date of data<br>Collection | No. of<br>population<br>Study Type | FES | Exclusion Criteria                                                                                                                                                                                            | Mean Age<br>(SD) | Female<br>(%) | Ischaemic<br>Stroke (%) | Pre-stroke<br>dementia<br>excluded | Pre-stroke<br>dementia<br>quantified | Follow-up<br>Duration | PSD Assessment<br>Method                                                                                  |
|-------------------------------------------------------|----------------------------|------------------------------------|-----|---------------------------------------------------------------------------------------------------------------------------------------------------------------------------------------------------------------|------------------|---------------|-------------------------|------------------------------------|--------------------------------------|-----------------------|-----------------------------------------------------------------------------------------------------------|
| Ihle-Hansen<br>et al,<br>2010, Norway<br>(S14)        | 2007-2008                  | N=184<br>P                         | Y   | SAH, TIA, MCI, Life<br>expectancy < 1<br>year                                                                                                                                                                 | 72 (12.2)        | 49.5          | 76.4                    | Y                                  | Y<br>IQCODE                          | 12 months             | MMSE & CDT +<br>TMT-A + TMT-B<br><br>ICD-10                                                               |
| Kumutpong<br>anich<br>et al,<br>2017 Thailand<br>(S5) | 2006-2007                  | N=85<br>X                          | Y * | Dementia before<br>stroke, Expired or<br>lost to follow up,<br>Unable to perform<br>neuropsychological<br>test, Imaging study<br>was not performed<br>or was lost,<br>Patients with<br>aphasia                | 69.4 (9.3)       | N/A           | 100                     | Y                                  | Y                                    | 12 months             | TMSE, Category<br>Verbal Fluency<br>Test,<br>Neuropsychiatric<br>Inventory<br><br>DSM-IV, NINDS-<br>AIREN |
| Mehrabian<br>et al,<br>2015 Bulgaria<br>(S17)         | N/A                        | N=74<br>P                          | Y   | ICH, NIHSS >6,<br>Persistent aphasia,<br>Severe sensory<br>impairment,<br>Malignant disease,<br>Neurological<br>conditions,<br>Psychiatric<br>conditions, History<br>of Pre-Stroke<br>Cognitive<br>Impairment | 65.6 (5.6)       | 21.2          | 100                     | Y                                  | N                                    | 12 months             | MMSE &<br>Neuropsychologic<br>al battery<br><br>DSM-IV, NINDS-<br>AIREN                                   |

| Study, Year<br>Country                        | Date of data<br>Collection | No. of<br>population<br>Study Type | FES | Exclusion Criteria                                                                                                                                                                                                                          | Mean Age<br>(SD) | Female<br>(%) | Ischaemic<br>Stroke (%) | Pre-stroke<br>dementia<br>excluded | Pre-stroke<br>dementia<br>quantified | Follow-up<br>Duration                               | PSD Assessment<br>Method                                                         |
|-----------------------------------------------|----------------------------|------------------------------------|-----|---------------------------------------------------------------------------------------------------------------------------------------------------------------------------------------------------------------------------------------------|------------------|---------------|-------------------------|------------------------------------|--------------------------------------|-----------------------------------------------------|----------------------------------------------------------------------------------|
| <b>Renjen et al,<br/>2015 India<br/>(S20)</b> | N/A                        | N=50<br>P                          | Y * | TIA,<br>Neurodegenerative<br>disorder, Moderate<br>to severe aphasia                                                                                                                                                                        | 61.8             | 36            | 74                      | Y                                  | Y<br>Short-IQCODE                    | 12 months                                           | PGI-Battery of<br>Brain Dysfunction<br>( PGI BBD > 30 ) &<br>IQCODE<br><br>DSM V |
| <b>Sarfo et al,<br/>2017, Ghana<br/>(S21)</b> | 2015-2016                  | N=58<br>X                          | N   | On sedatives,<br>Aphasia without<br>proxy, Significant<br>physical illness,<br>Motor/Sensory<br>impairment<br>(hearing visual),<br>Neurological or<br>psychiatric illness<br><br>Systemic disorders<br>capable of<br>impairing<br>cognition | 59.9<br>(13.7)   | 47.6          | 66                      | N                                  | NA                                   | 3 months,<br>12 months,<br>2-4 years<br>and 5 years | MoCA & V-NB<br><br>DSM IV                                                        |
| <b>Selim et al,<br/>2009 Egypt<br/>(S22)</b>  | 2007-2008                  | N=66<br>P                          | Y * | TIA, SAH, CVT,<br>Seizure history,<br>Severe head<br>trauma history,<br>Neurological<br>surgery                                                                                                                                             | Median<br>age 63 | 47.0          | 74.2                    | Y                                  | Y<br>IQCODE                          | 18 months                                           | MMSE + Neuro-<br>psychological<br>battery<br><br>ICD-10                          |

| Study, Year<br>Country                           | Date of data<br>Collection | No. of<br>population<br>Study Type | FES | Exclusion Criteria                                                                                                                                                                                                                                                      | Mean Age<br>(SD) | Female<br>(%) | Ischaemic<br>Stroke (%) | Pre-stroke<br>dementia<br>excluded | Pre-stroke<br>dementia<br>quantified | Follow-up<br>Duration | PSD Assessment<br>Method                                     |
|--------------------------------------------------|----------------------------|------------------------------------|-----|-------------------------------------------------------------------------------------------------------------------------------------------------------------------------------------------------------------------------------------------------------------------------|------------------|---------------|-------------------------|------------------------------------|--------------------------------------|-----------------------|--------------------------------------------------------------|
| <b>Surawan et al,<br/>2018 Thailand<br/>(S4)</b> | 2017                       | N=138<br>P                         | Y * | Depression,<br>Vitamin B12<br>deficiency, renal<br>failure,<br>hypothyroid,<br>syphilis, HIV, Pick's<br>disease, CJD,<br>Huntington's<br>disease,<br>Parkinson's,<br>Alzheimer's<br>Disease, Sensory<br>impairment<br>(hearing/ visual),<br>Communication<br>impairment | Mean 69          | 46.1          | 100                     | Y                                  | N                                    | 3 and 6<br>months     | MMSE-Thai 2002 (<br>≤ 23 )<br><br>Modified DSM V             |
| <b>Yang et al,<br/>2015 Hong<br/>Kong (S25)</b>  | 2009-2010                  | N=1013<br>P, X                     | Y * | Severe language<br>impairment,<br>Terminal illness,<br>Psychiatric<br>comorbidity                                                                                                                                                                                       | 69.2<br>(11.7)   | 44.3          | 70.1                    | Y                                  | Y<br><br>Not reported                | 6 months              | Cantonese MMSE<br>+ MoCA (HK<br>Version)<br><br>DSM IV & CDR |
| <b>Akinyemi et al,<br/>2014 Nigeria<br/>(S8)</b> | 2010-12                    | N=143<br>P                         | N   | SAH, Moderate to<br>severe aphasia,<br>Significant physical<br>and sensory<br>impairment,<br>Psychiatric history                                                                                                                                                        | 60.4 (9.5)       | 43.4          | 79.5                    | N                                  | Y<br><br>CSID-<br>informant<br>part  | 3 months              | CSID + MMSE + V-<br>NB                                       |

| Study, Year<br>Country                          | Date of data<br>Collection | No. of<br>population<br>Study Type | FES | Exclusion Criteria                                                                                                     | Mean Age<br>(SD) | Female<br>(%) | Ischaemic<br>Stroke (%) | Pre-stroke<br>dementia<br>excluded | Pre-stroke<br>dementia<br>quantified | Follow-up<br>Duration | PSD Assessment<br>Method                                               |
|-------------------------------------------------|----------------------------|------------------------------------|-----|------------------------------------------------------------------------------------------------------------------------|------------------|---------------|-------------------------|------------------------------------|--------------------------------------|-----------------------|------------------------------------------------------------------------|
|                                                 |                            |                                    |     |                                                                                                                        |                  |               |                         |                                    |                                      |                       | DSM-IV+<br>AHA/ASA VCI<br>criteria                                     |
| <b>Arauz et al,<br/>2014 Mexico<br/>(S9)</b>    | 2005                       | N=110<br>P, X                      | Y   | TIA, SAH, Severe<br>aphasia                                                                                            | 56 (17.8)        | 38.2          | 84.0                    | Y                                  | Y<br>IQ-CODE                         | 3 months              | CASI<br><br>CDR + DSM-IV /<br>NINDS-AIREN                              |
| <b>Assayag et al,<br/>2017 Israel<br/>(S26)</b> | 2008-14                    | N=507<br>L                         | Y   | Head trauma or<br>brain procedures,<br>ICH, Severe aphasia                                                             | 67.4 (9.7)       | 40.6          | 100                     | Y                                  | N<br>IQ-CODE                         | 24 months             | MoCA &<br>NeuroTrax<br>computerised<br>Cognitive Testing<br><br>DSM-IV |
| <b>Barba et al ,<br/>2000 Spain,<br/>(S28)</b>  | 1994-95                    | N=251<br>X, L                      | N   | Primary brain<br>lesion, aphasia,<br>comorbidity                                                                       | 69               | 47            | 88.4                    | N                                  | Y<br>IQ-CODE                         | 3,6,24<br>months      | DSM IIIR                                                               |
| <b>Censori et al,<br/>2000 Italy,<br/>(S29)</b> | 1993-94                    | 110<br>X                           | Y   | Age <40 or ≥80<br>years, other<br>neurological<br>disorder, unusual<br>cause of stroke,<br>comorbidity,<br>depression, | 65               | 35            | 100                     | Y                                  | N                                    | 3 months              | NINDS A                                                                |

| Study, Year<br>Country                                  | Date of data<br>Collection  | No. of<br>population<br>Study Type | FES | Exclusion Criteria                                                                                                                                                                             | Mean Age<br>(SD) | Female<br>(%) | Ischaemic<br>Stroke (%) | Pre-stroke<br>dementia<br>excluded | Pre-stroke<br>dementia<br>quantified | Follow-up<br>Duration                  | PSD Assessment<br>Method             |
|---------------------------------------------------------|-----------------------------|------------------------------------|-----|------------------------------------------------------------------------------------------------------------------------------------------------------------------------------------------------|------------------|---------------|-------------------------|------------------------------------|--------------------------------------|----------------------------------------|--------------------------------------|
|                                                         |                             |                                    |     | sensory<br>impairment                                                                                                                                                                          |                  |               |                         |                                    |                                      |                                        |                                      |
| <b>Desmond et,<br/>1996 al USA,<br/>(S32)</b>           | 1988–90<br>1994–97          | N=453<br>X, L                      | N   | Dysphasia, unable<br>to speak English or<br>Spanish, low GCS,<br>age <60 years                                                                                                                 | 70               | 53            | 100                     | N<br>N (Y in<br>L study)           | N                                    | 3 months,<br>annually up<br>to 4 years | DSM III                              |
| <b>Gorelick et al,<br/>1993 USA,<br/>(S44)</b>          | 1987–90                     | N=147<br>X                         | N   | Aphasia,<br>Parkinson's<br>disease, possible<br>prior<br><br>Alzheimer's disease                                                                                                               | 72               | 49            | 100<br>(Multiple IS)    | N                                  | N                                    | 2-3months                              | DSM III                              |
| <b>Khedr et al,<br/>2009 Egypt,<br/>(S16)</b>           | N/A<br>(1 year<br>duration) | N=81<br>p                          | Y   | Poor<br>consciousness,<br>Persistent Aphasia,<br>Psychosis, SAH,<br>Systemic Disease,<br>cancer, Severe<br>head trauma<br>history,<br>Neurological<br>surgery, Severe<br>sensory<br>impairment | 57.7<br>(5.19)   | 33.3          | 84                      | Y                                  | Y<br>IQCODE                          | 3 months                               | MMSE <21 / CASI<br><67<br><br>DSM-IV |
| <b>Klimkowicz et<br/>al,<br/>2002 Poland,<br/>(S37)</b> | 2000–01                     | N=220<br>X                         | N   | Age ≤40 years, no<br>reliable informant,<br>other brain lesion                                                                                                                                 | 66               | 55            | 87.2                    | N                                  | Y<br>IQCODE                          | 3 months                               | DSM IV                               |

| Study, Year<br>Country                                | Date of data<br>Collection | No. of<br>population<br>Study Type | FES | Exclusion Criteria                                                                                                                      | Mean Age<br>(SD) | Female<br>(%) | Ischaemic<br>Stroke (%) | Pre-stroke<br>dementia<br>excluded | Pre-stroke<br>dementia<br>quantified | Follow-up<br>Duration | PSD Assessment<br>Method               |
|-------------------------------------------------------|----------------------------|------------------------------------|-----|-----------------------------------------------------------------------------------------------------------------------------------------|------------------|---------------|-------------------------|------------------------------------|--------------------------------------|-----------------------|----------------------------------------|
| <b>Tang et al,<br/>2004, China<br/>(S40)</b>          | Data not<br>available      | N=280<br>X                         |     | Non-Chinese ethnic<br>group, non-<br>Cantonese<br><br>speaking, age <50<br>years                                                        | 71               | 55            | Not<br>reported         | N                                  | Y (FU only)<br><br>(IQCODE)          | 3 months              | DSM IV                                 |
| <b>Tang et al,<br/>2017 Taiwan<br/>(S23)</b>          | 2014-15                    | N=172<br>X                         | N   | Active infection,<br>cancer, renal<br>disease,<br><br>autoimmune<br>disorder, Current<br>steroid treatment,<br>Poor diabetes<br>control | 72.1 (7.5)       | 35.5          | 100                     | N                                  | NA                                   | 85±54.0<br>months     | MMSE & MoCA<br><br>NINDS-AIREN,<br>CDR |
| <b>Ojagbemi et<br/>al,<br/>2017 Nigeria<br/>(S18)</b> | 2014-16                    | N=96<br>P                          | N   | Unable to<br>communicate<br>reliably, Aphasia,<br>Severe-co-<br>morbidities                                                             | 61.1<br>(12.9)   | 46.5          | N/A                     | N                                  | Y<br><br>IQ-CODE                     | 3 months              | MMSE<br><br>NINDS-AIREN                |
| <b>Pohjasvaara<br/>et al Finland,<br/>1997 (S38)</b>  | 1993–95                    | N=451<br>X                         | N   | Age <55 or >85<br>years, unable to<br>speak Finnish,                                                                                    | 71               | 49            | 100                     | N                                  | Y (FU only)<br><br>Interview         | 3 months              | DSM III                                |



| Study, Year<br>Country                          | Date of data<br>Collection | No. of<br>population<br>Study Type | FES | Exclusion Criteria                                                                                                                     | Mean Age<br>(SD) | Female<br>(%) | Ischaemic<br>Stroke (%) | Pre-stroke<br>dementia<br>excluded | Pre-stroke<br>dementia<br>quantified | Follow-up<br>Duration | PSD Assessment<br>Method                               |
|-------------------------------------------------|----------------------------|------------------------------------|-----|----------------------------------------------------------------------------------------------------------------------------------------|------------------|---------------|-------------------------|------------------------------------|--------------------------------------|-----------------------|--------------------------------------------------------|
|                                                 |                            |                                    |     | non-resident in Helsinki, reduced conscious level, poor hearing, aphasia                                                               |                  |               |                         |                                    |                                      |                       |                                                        |
| <b>Yu et al,<br/>2013, South<br/>Korea (S7)</b> | 2007-08                    | N=328<br>P                         | Y * | Severe medical or neurological condition, Severe aphasia, death within 2 weeks of stroke onset                                         | 63.9<br>(12.4)   | 38.8          | 100                     | N                                  | Y<br>IQCODE                          | 3 months              | K-VCIH-S-NP<br>protocol + Korean<br>MMSE<br><br>DSM-IV |
| <b>Zhou et al,<br/>2004, China<br/>(S41)</b>    | 1999-00                    | N=434<br>X                         | N   | Concomitant neurological disorder, age <55 years,<br><br>severe medical comorbidity or sensory impairment, reduced GCS, severe aphasia | 68               | 47            | 100                     | N                                  | Y (FU only)<br>IQCODE                | 3 months              | DSM IV                                                 |
| <b>Appelros et al<br/>2002 Sweden<br/>(S45)</b> | 1999-00                    | N=232<br>P, X                      | Y   | Aphasia                                                                                                                                | 74               | 50            | 73.0                    | N                                  | Y<br>Interview                       | 1 year                | MMSE                                                   |

| Study, Year<br>Country                           | Date of data<br>Collection | No. of<br>population<br>Study Type | FES | Exclusion Criteria                                                    | Mean Age<br>(SD) | Female<br>(%) | Ischaemic<br>Stroke (%) | Pre-stroke<br>dementia<br>excluded | Pre-stroke<br>dementia<br>quantified                                                             | Follow-up<br>Duration                  | PSD Assessment<br>Method                                                                                                     |
|--------------------------------------------------|----------------------------|------------------------------------|-----|-----------------------------------------------------------------------|------------------|---------------|-------------------------|------------------------------------|--------------------------------------------------------------------------------------------------|----------------------------------------|------------------------------------------------------------------------------------------------------------------------------|
| <b>Corraini et al,<br/>2017 Norway<br/>(S12)</b> | 1982-13                    | N=215,118<br>R                     | Y   | Previous stroke,<br>mild cognitive<br>impairment,<br>amnesic syndrome | Median<br>age 72 | 47.6          | 39.2                    | Y                                  | Y                                                                                                | 30 years                               | ICD-10                                                                                                                       |
| <b>Das et al,<br/>2013 India<br/>(S3)</b>        | 2006-10                    | N=219<br>P                         | Y * | TIA, Aphasia,<br>Psychosis, Sensory<br>impairment<br>(hearing/visual) | 74.5<br>(8.30)   | 48            | N/A                     | N                                  | NA                                                                                               | 36 months                              | BMSE (adaptation<br>of MMSE) +<br>Kolkata Cognitive<br>Screening Battery<br><br>CDR + DSM III-R                              |
| <b>Kokmen et al<br/>1996, USA<br/>(S42)</b>      | 1960-84                    | N=971<br>R                         | Y   | Previous stroke or<br>dementia                                        | Not<br>available | 50            | 100                     | NA                                 | Records                                                                                          | Up to 25<br>years                      | NA                                                                                                                           |
| <b>Pendlebury et<br/>al,<br/>2019, UK (S6)</b>   | 2002-12                    | N=2080<br>P, L                     | N   | Previous diagnosis<br>of dementia                                     | 74.4<br>(13.0)   | 51            | 64.3                    | Y                                  | Y<br><br>MMSE /<br>MoCA<br><br>/ Telephone<br>Interview for<br>Cognitive<br>Status -<br>Modified | 60 months<br><br>(median 4.2<br>years) | MMSE (< 24) &<br>MoCA<br><br>MoCA (Telephone<br>Version)<br><br>Telephone<br>Interview for<br>Cognitive Status -<br>Modified |

| Study, Year<br>Country                                   | Date of data<br>Collection | No. of<br>population<br>Study Type | FES | Exclusion Criteria                                                                                                                          | Mean Age<br>(SD) | Female<br>(%) | Ischaemic<br>Stroke (%) | Pre-stroke<br>dementia<br>excluded | Pre-stroke<br>dementia<br>quantified | Follow-up<br>Duration                   | PSD Assessment<br>Method                                                                     |
|----------------------------------------------------------|----------------------------|------------------------------------|-----|---------------------------------------------------------------------------------------------------------------------------------------------|------------------|---------------|-------------------------|------------------------------------|--------------------------------------|-----------------------------------------|----------------------------------------------------------------------------------------------|
|                                                          |                            |                                    |     |                                                                                                                                             |                  |               |                         |                                    |                                      |                                         | DSM-IV                                                                                       |
| <b>Srikanth et al,<br/>2004,<br/>Australia<br/>(S39)</b> | 1998-99                    | N=198X, L,<br>PPS                  | Y   | Aphasia, unable to<br>speak English,<br><br>inadequate vision<br>or hearing                                                                 | 69               | 41            | 93.2                    | N                                  | NA                                   | 3 months; 1,<br>2 years                 | DSM-IV                                                                                       |
| <b>Qu et al,<br/>2015, China<br/>(S1)</b>                | 2012-13                    | N=599<br><br>X                     | N   | TIA, Existing<br>neurological or<br>psychiatric<br>disorders, Aphasia,<br>Sensory<br>impairment<br>(hearing/ visual),<br>Poor consciousness | 67.9<br>(16.6)   | 54            | 86.5                    | Y                                  | N                                    | Not<br>specified.<br>Assumed 1<br>year. | MOCA + MMSE<br>with stratification<br>cut-off by<br>education,<br><br>Hachinski<br>Ischaemic |
| <b>Clark et al,<br/>2018, USA<br/>(S11)</b>              | 2000-10                    | N=68,758<br><br>R, L               | N   | Prior diagnosis of<br>dementia                                                                                                              | 68 (13)          | 51            | 100                     | Y                                  | N<br><br>Exclusion<br>criteria       | 60 months                               | ICD-9                                                                                        |
| <b>Kase et al,<br/>1998, USA<br/>(S36)</b>               | 1982-01                    | N=74<br><br>L, V                   |     | Previous stroke or<br>dementia                                                                                                              | 79               | 61            | 68.9                    | Y                                  | Y                                    | 10 years                                | DSM III, MMSE<br><br>DSM IV                                                                  |

| Study, Year<br>Country                                     | Date of data<br>Collection | No. of<br>population<br>Study Type | FES | Exclusion Criteria                                                                    | Mean Age<br>(SD) | Female<br>(%) | Ischaemic<br>Stroke (%) | Pre-stroke<br>dementia<br>excluded | Pre-stroke<br>dementia<br>quantified | Follow-up<br>Duration            | PSD Assessment<br>Method                                                                                                                                                                                             |
|------------------------------------------------------------|----------------------------|------------------------------------|-----|---------------------------------------------------------------------------------------|------------------|---------------|-------------------------|------------------------------------|--------------------------------------|----------------------------------|----------------------------------------------------------------------------------------------------------------------------------------------------------------------------------------------------------------------|
| <b>Portegies et al,<br/>2016<br/>Netherlands<br/>(S19)</b> | 1990-12                    | N=993<br>P                         | Y   | Prevalent stroke,<br>Prevalent<br>dementia                                            | 79.9 (8.7)       | 60.4          | N/A                     | Y                                  | Y<br>MMSE                            | 115 months<br>(+/- 72<br>months) | 3 step protocol :<br>MMSE<26,<br>Geriatric Metal<br>Schedule (GMS)>0<br>and Cambridge<br>Examination for<br>Mental Disorders<br>in the Elderly<br><br>Neurologist-led<br>clinical<br>diagnosis/consens<br>us meeting |
| <b>Kim et al,<br/>2017 South<br/>Korea (S15)</b>           | 2002                       | N=2527<br>P                        | Y   | Non-citizens<br>(Korea), Stroke and<br>dementia between<br>year 2002 &<br>2003        | 72               | 54.8          | N/A                     | Y                                  | N                                    | 120 months                       | ICD-10                                                                                                                                                                                                               |
| <b>Tu et al,<br/>2013 China<br/>(S24)</b>                  | 2008-11                    | N=689<br>X                         | N   | ICH, Alcohol,<br>Severe aphasia,<br>Severe sensory<br>impairment<br>(hearing/ visual) | 68.6<br>(11.4)   | 41.4          | 100                     | Y                                  | N                                    | 3 months                         | MOCA-CS +<br>MMSE +<br>FAB-CS                                                                                                                                                                                        |

| Study, Year<br>Country                                                                                                                                                                                                                                                                                                                                                                                                                                                                                                                                                                                                                                                                                                                                                                                                                                                                                                                                                                                                                                                                                                                                                                                                                                                                                                                                                                                                                                                                                                                                                                                                                                                                                                                                                                                                                                                                                                                                                                                                                                                                                                                                                                                                                                                                                               | Date of data<br>Collection | No. of<br>population<br>Study Type | FES | Exclusion Criteria                                                                                                                                                                                                                                                     | Mean Age<br>(SD)                      | Female<br>(%) | Ischaemic<br>Stroke (%) | Pre-stroke<br>dementia<br>excluded | Pre-stroke<br>dementia<br>quantified | Follow-up<br>Duration                     | PSD Assessment<br>Method                            |
|----------------------------------------------------------------------------------------------------------------------------------------------------------------------------------------------------------------------------------------------------------------------------------------------------------------------------------------------------------------------------------------------------------------------------------------------------------------------------------------------------------------------------------------------------------------------------------------------------------------------------------------------------------------------------------------------------------------------------------------------------------------------------------------------------------------------------------------------------------------------------------------------------------------------------------------------------------------------------------------------------------------------------------------------------------------------------------------------------------------------------------------------------------------------------------------------------------------------------------------------------------------------------------------------------------------------------------------------------------------------------------------------------------------------------------------------------------------------------------------------------------------------------------------------------------------------------------------------------------------------------------------------------------------------------------------------------------------------------------------------------------------------------------------------------------------------------------------------------------------------------------------------------------------------------------------------------------------------------------------------------------------------------------------------------------------------------------------------------------------------------------------------------------------------------------------------------------------------------------------------------------------------------------------------------------------------|----------------------------|------------------------------------|-----|------------------------------------------------------------------------------------------------------------------------------------------------------------------------------------------------------------------------------------------------------------------------|---------------------------------------|---------------|-------------------------|------------------------------------|--------------------------------------|-------------------------------------------|-----------------------------------------------------|
|                                                                                                                                                                                                                                                                                                                                                                                                                                                                                                                                                                                                                                                                                                                                                                                                                                                                                                                                                                                                                                                                                                                                                                                                                                                                                                                                                                                                                                                                                                                                                                                                                                                                                                                                                                                                                                                                                                                                                                                                                                                                                                                                                                                                                                                                                                                      |                            |                                    |     |                                                                                                                                                                                                                                                                        |                                       |               |                         |                                    |                                      |                                           | CDR + NINDS-<br>AIREN                               |
| <b>Zhang et al,<br/>2017<br/>Mongolia (S2)</b>                                                                                                                                                                                                                                                                                                                                                                                                                                                                                                                                                                                                                                                                                                                                                                                                                                                                                                                                                                                                                                                                                                                                                                                                                                                                                                                                                                                                                                                                                                                                                                                                                                                                                                                                                                                                                                                                                                                                                                                                                                                                                                                                                                                                                                                                       | N/A                        | N= 444<br>X                        | N   | Neurological<br>system disease<br>that may affect<br>cognition (AD),<br>History of<br>psychoactive drug<br>abuse, CO<br>/chemical<br>poisoning, chronic<br>alcoholism, Severe<br>aphasia, Sensory<br>impairment<br>(hearing/ visual),<br>History of mental<br>disorder | spilt into<br>different<br>categories | 43.9          | 87.4                    | Y                                  | N                                    | Not<br>Specified.<br>Assumed 3<br>months. | MoCA - Beijing<br>Version<br>HIS<br><br>NINDS-AIREN |
| <p><b>Included in previous meta-analysis Y* = included in the pre-stroke dementia analysis only</b></p> <p><b>P</b> - Prospective / <b>R</b> - Retrospective / <b>X</b> - Cross Sectional / <b>L</b> - Longitudinal (studies with multiple follow-ups beyond 12 months).</p> <p><b>FES</b> – Studies recruiting (<b>FES</b>) First Ever Stroke Candidates: Y = Yes N = No (Mixed Population Data) Y * = Study recruiting mixed population but with FES and Recurrent Stroke Data available</p> <p><b>CVT</b> – Cerebral Venous Thrombosis, <b>ICH</b> – Intra-Cerebral Haemorrhage, <b>MCI</b> – Mild cognitive Impairment, <b>NIHSS</b> – National Institutes of Health Stroke Scale, <b>SAH</b> – Subarachnoid Haemorrhage, <b>TIA</b> – Transient Ischaemic Attack <b>AHA/ASA</b> – American Heart Association/American Stroke Association; <b>BMSE</b> – Bengali Version of Hindi Mental State Examination</p> <p><b>CASI</b> – Community Abilities Screening Instrument; <b>CDR</b> – Clinical Dementia Rating, <b>CSID</b> – Community Screening Instrument of Dementia; <b>DSM</b> – Diagnostics and Statistical Manual; <b>FAB-CS</b> – Frontal Assessment Battery-Chang Sha Version, <b>ICD</b> – International Statistical Classification of Diseases and Related Health Problems; <b>HIS</b> – Hachinski Ischaemic Score; <b>IQCODE</b> – Informant Questionnaire on The Cognitive Decline in Elderly; <b>SS-IQCODE</b> – Shortened Spanish IQCODE; <b>K-VCIHS-NP</b> – Korean-Vascular Cognitive Impairment Harmonisation Standards-Neuro-Psychological; <b>MoCA-CS</b> – Montreal Cognitive Assessment-Chang Sha Version; <b>NINDS-AIREN</b> - National Institute of Neurological Disorders and Stroke and Association Internationale; <b>PGI-BBD</b> – PGI-Battery of Brain Dysfunction pour la Recherche et l'Enseignement en Neurosciences. (Vascular Dementia Criteria); <b>TMSE</b> – Thai Mental State Examination</p> <p><b>TMT-A</b> – Train Making Test – A; <b>TMT-B</b> – Train Making Test – B; <b>5WDFR</b> – 5-Word Delay Free Recall; <b>V-NB</b> – Vascular Neuro-Psychological Battery</p> <p>*** PSD Data: <b>MIXED</b> : Pre-Stroke Dementia not evaluated/excluded. PSDanalysis includes possible pre-stroke dementia data. <b>PSD</b> : PSDData (Pre-Stroke Dementia Excluded)</p> |                            |                                    |     |                                                                                                                                                                                                                                                                        |                                       |               |                         |                                    |                                      |                                           |                                                     |

| Study, Year<br>Country                                                                                                                                                                                 | Date of data<br>Collection | No. of<br>population<br>Study Type | FES | Exclusion Criteria | Mean Age<br>(SD) | Female<br>(%) | Ischaemic<br>Stroke (%) | Pre-stroke<br>dementia<br>excluded | Pre-stroke<br>dementia<br>quantified | Follow-up<br>Duration | PSD Assessment<br>Method |
|--------------------------------------------------------------------------------------------------------------------------------------------------------------------------------------------------------|----------------------------|------------------------------------|-----|--------------------|------------------|---------------|-------------------------|------------------------------------|--------------------------------------|-----------------------|--------------------------|
| <b>PSD Assessment Method - CD-S:</b> Clinical Diagnosis using standard classification system; <b>CD-Other:</b> Clinical diagnosis using other assessment tool; <b>NPB:</b> Neuro-Psychological Battery |                            |                                    |     |                    |                  |               |                         |                                    |                                      |                       |                          |

**Table S2** Results of Sensitivity Analysis

| Outcome                                    | No. of studies | Prevalence % (95% CI) | Prevalence % (95% CI), n= number of studies |
|--------------------------------------------|----------------|-----------------------|---------------------------------------------|
| <b>Removal of outliers</b>                 |                |                       |                                             |
| Prevalence any timeframe                   |                |                       |                                             |
| Including pre-stroke dementia              | 16             | 21.4(18.2-25.0)       | 22.3 (18.8 to 26.2), n=17,                  |
| Excluding pre-stroke dementia              | 26             | 15.6 (14.0-17.3)      | 16.5(10.4 to 25.1), n=33                    |
| Prevalence at 1 year                       |                |                       |                                             |
| Including pre-stroke dementia              | 6              | 20.4(14.2-28.2)       | 20.4 (14.2 to 28.2), n= 6                   |
| Excluding pre-stroke dementia              | 14             | 20.5(15.0-27.4)       | 18.4 (7.4 to 38.7), n=16                    |
| <b>Removal of moderate quality studies</b> |                |                       |                                             |
| Prevalence any timeframe                   |                |                       |                                             |
| Including pre-stroke dementia              | 14             | 21.3(17.2-26.2)       | 22.3 (18.8 to 26.2), n=17,                  |
| Excluding pre-stroke dementia              | 25             | 15.3(7.9-27.5)        | 16.5(10.4 to 25.1), n=33                    |
| Prevalence at 1 year                       |                |                       |                                             |
| Including pre-stroke dementia              | 4              | 17.4(9.2-30.4)        | 20.4 (14.2 to 28.2), n=6                    |
| Excluding pre-stroke dementia              | 14             | 17.2(6.7-37.3)        | 18.4 (7.4 to 38.7), n=16                    |

**Table S3 Overall strength of evidence**

| <b>Prevalence of Post- Stroke Dementia</b> |                    |                   |                  |                         |                                                            |                            |
|--------------------------------------------|--------------------|-------------------|------------------|-------------------------|------------------------------------------------------------|----------------------------|
| <b>Risk of Bias</b>                        | <b>Consistency</b> | <b>Directness</b> | <b>Precision</b> | <b>Publication Bias</b> | <b>Effect (95%CI)</b>                                      | <b>Quality of Evidence</b> |
| Possibly serious                           | Serious            | Not serious       | Serious          | Possibly serious        | 22.3%<br>95%CI:18.8 to 26.2<br>16.5%<br>95%CI:10.4 to 25.1 | <b>Low</b>                 |
