# Supplementary material for: Prevalence of dementia in ischaemic or mixed stroke populations: systematic review and meta-analysis
Source: PubMed Central journal article supplement — J Neurol Neurosurg Psychiatry. 2021 Nov 15;93(2):180–7. doi: 10.1136/jnnp-2020-325796 (PMC8784999; doi:10.1136/jnnp-2020-325796), 2021-11-15

**Figure S13** Meta-regression of dementia (event rate log scale) occurrence against year of recruitment (all timeframes) for studies including pre-stroke dementia

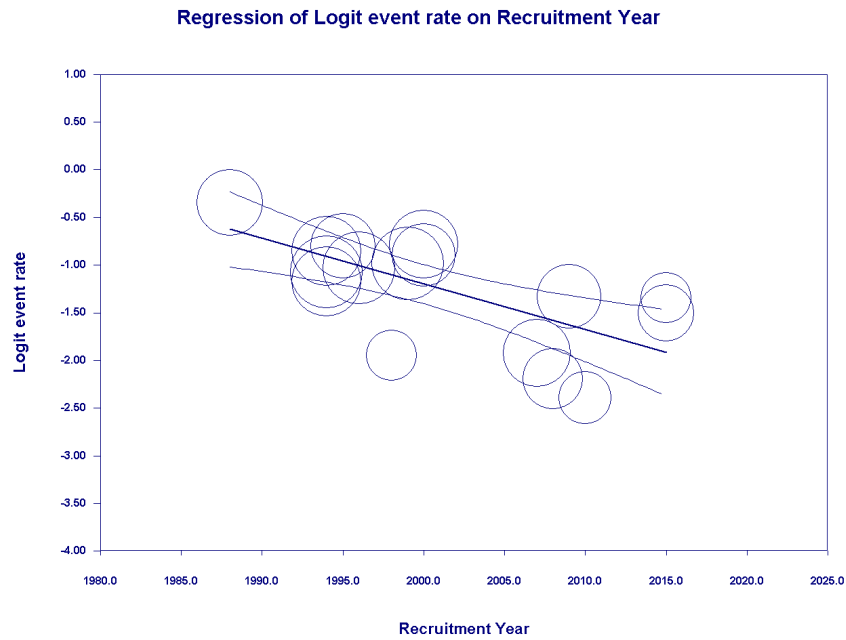

Supplement: jnnp-2020-325796supp017.pdf [file jnnp-2020-325796supp017.pdf]
