# Supplementary figures and images for: Prevalence of dementia in ischaemic or mixed stroke populations: systematic review and meta-analysis
Source: PubMed Central journal article supplement — J Neurol Neurosurg Psychiatry. 2021 Nov 15;93(2):180–7. doi: 10.1136/jnnp-2020-325796 (PMC8784999; doi:10.1136/jnnp-2020-325796), 2021-11-15

**Figure S1 Post-stroke prevalence – including pre-stroke dementia (all timeframes)**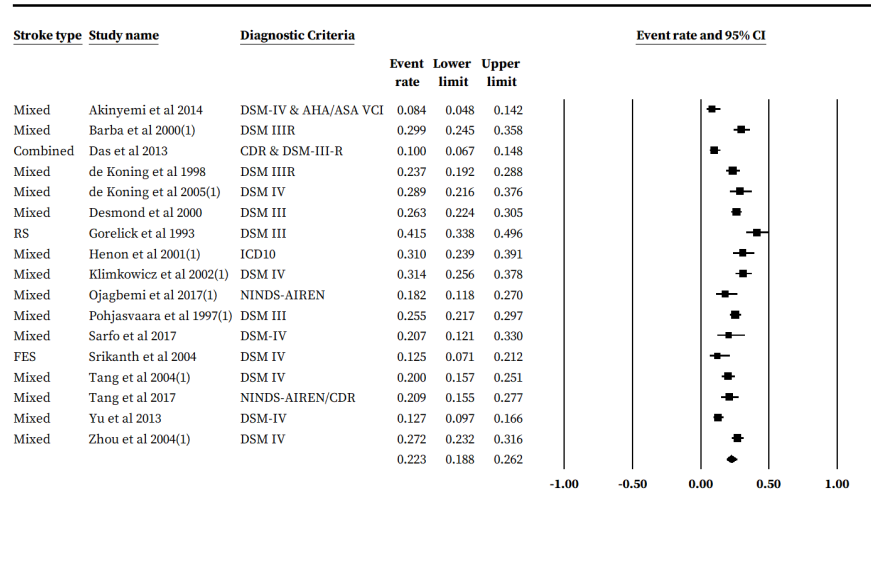

Supplement: jnnp-2020-325796supp005.pdf [file jnnp-2020-325796supp005.pdf]

Figure S2 Post-stroke prevalence - excluding pre-stroke dementia (all timeframes)

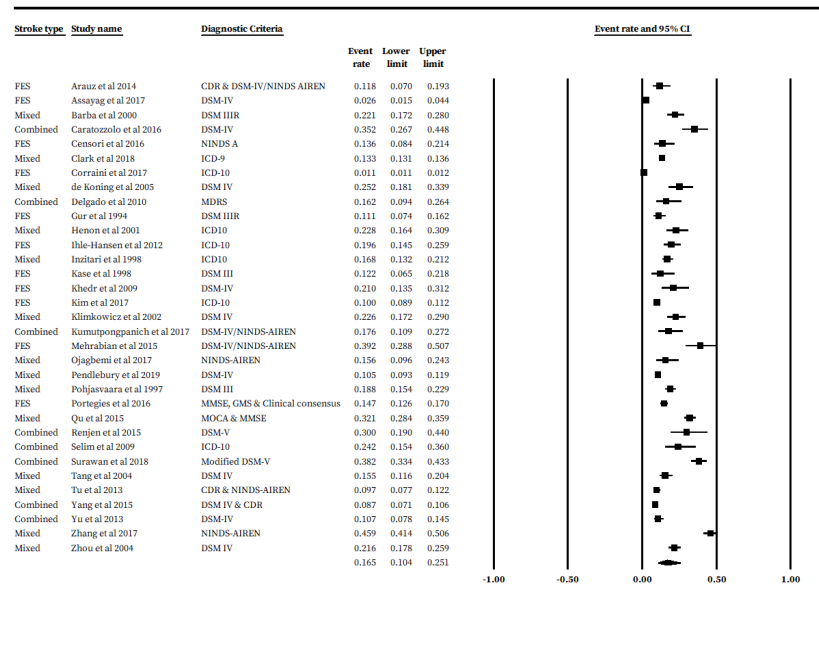

Supplement: jnnp-2020-325796supp006.pdf [file jnnp-2020-325796supp006.pdf]

**Figure S3** Post-stroke prevalence-including pre-stroke dementia (one year)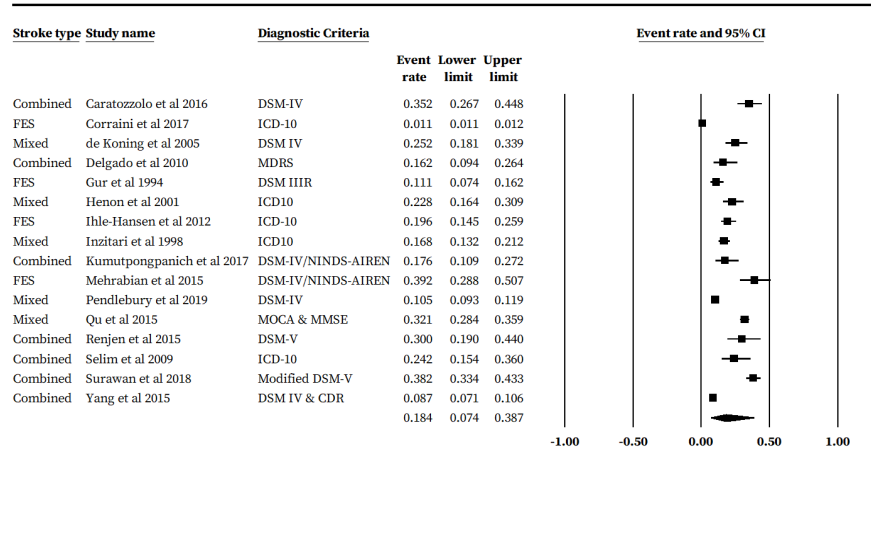

Supplement: jnnp-2020-325796supp007.pdf [file jnnp-2020-325796supp007.pdf]

**Figure S4** Post-stroke prevalence-not excluding pre-stroke dementia (one year)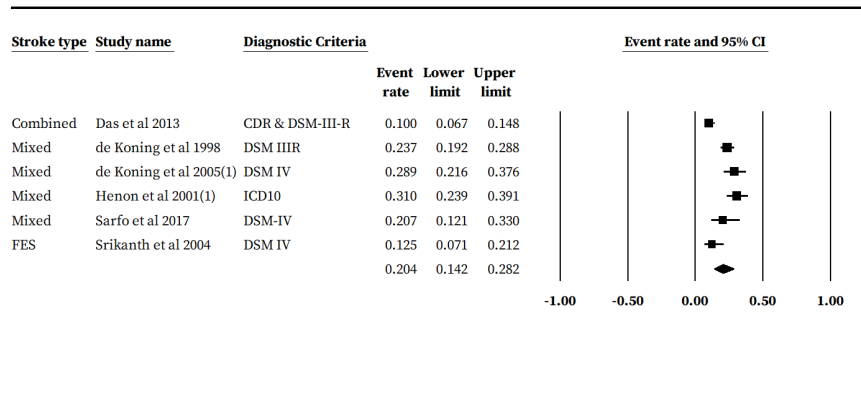

Supplement: jnnp-2020-325796supp008.pdf [file jnnp-2020-325796supp008.pdf]

Figure S9 Prevalence over time

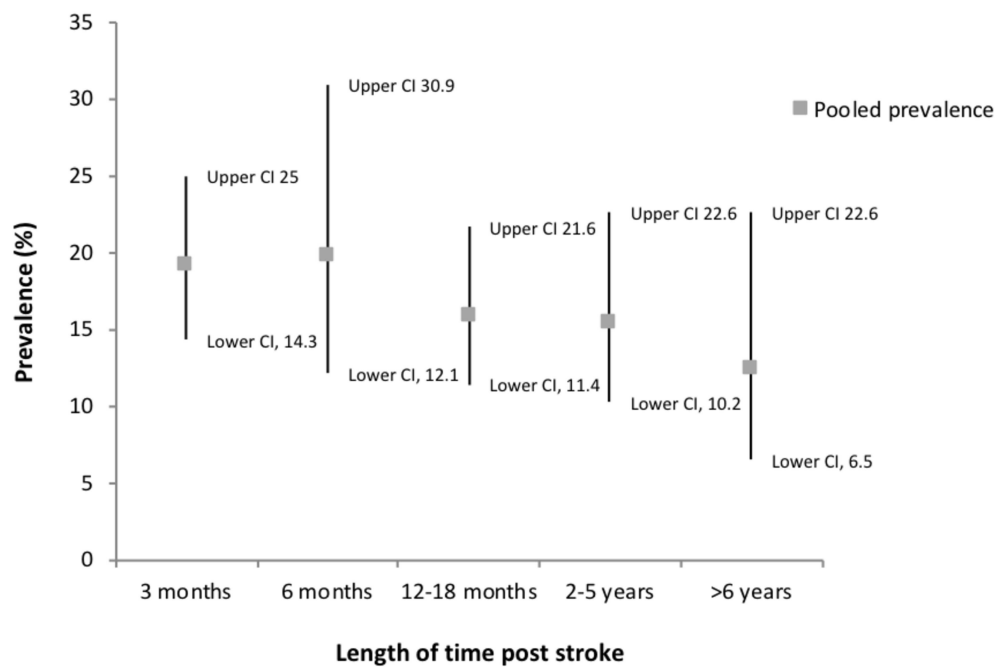

Supplement: jnnp-2020-325796supp013.pdf [file jnnp-2020-325796supp013.pdf]

**Figure S10** Funnel Plot (PSD all timeframes, excluding pre-stroke dementia)

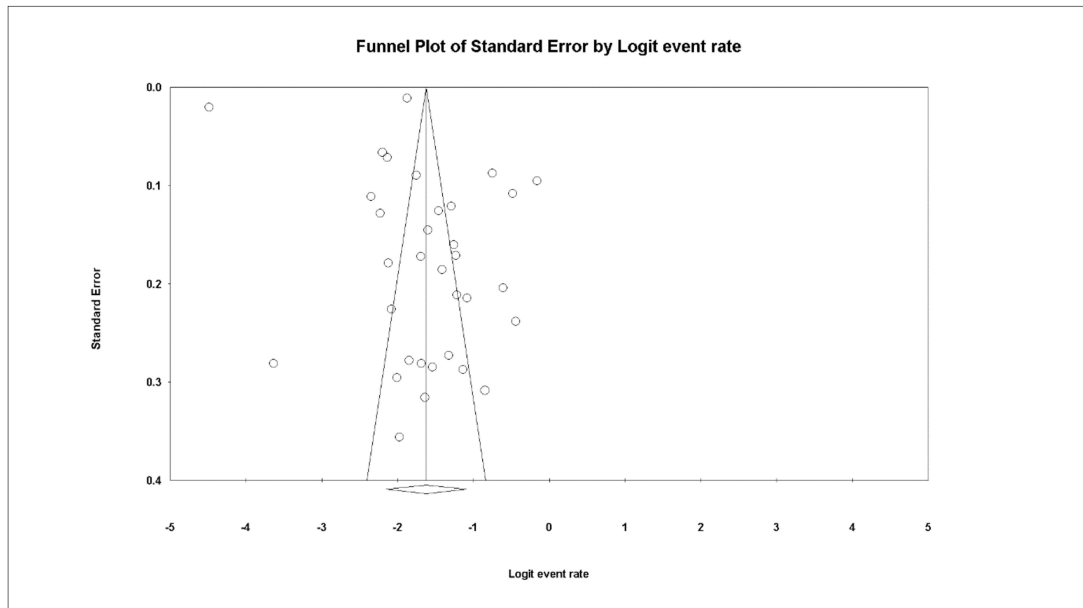

Supplement: jnnp-2020-325796supp014.pdf [file jnnp-2020-325796supp014.pdf]

**Figure S11** Funnel Plot (PSD all timeframes, including pre-stroke dementia)

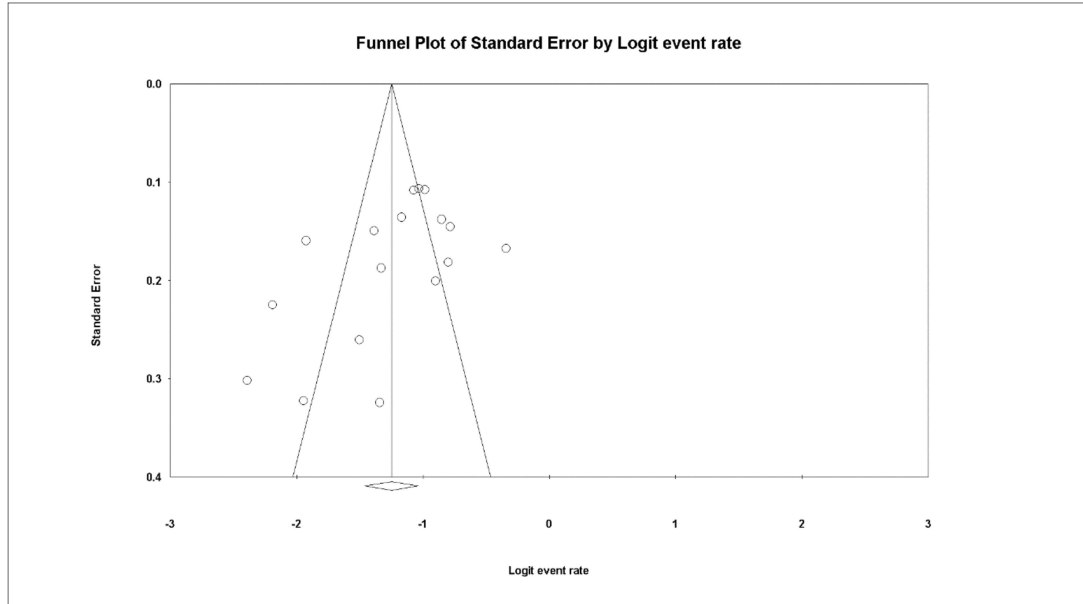

Supplement: jnnp-2020-325796supp015.pdf [file jnnp-2020-325796supp015.pdf]
